# Supplementary material for: Crystallography and magnetism of radicals with hindered hydroxyl groups: 2-(3,5-di-tert-butyl-4-hydroxyphenyl)-4,4,5,5-tetramethyl-4,5-dihydro-1H-imidazole-3-oxide-1-oxyl and 2-(3,5-di-tert-butyl-4-hydroxyphenyl)-4,4,5,5-tetramethyl-4,5-dihydro-1H-imidazole-1-oxyl
Source: Royal Society of Chemistry journal article supplement (doi:10.1039/b411574k), 2004-01-01
Supplement: b411574k.pdf [file b411574k.pdf]

Supporting Material for

**Crystallography and magnetism of radicals with hindered hydroxyl groups: 2-(3,5-di-*tert*-butyl-4-hydroxyphenyl)-4,4,5,5-tetramethyl-4,5-dihydro-1*H*-imidazole-3-oxide-1-oxyl and 2-(3,5-di-*tert*-butyl-4-hydroxyphenyl)-4,4,5,5-tetramethyl-4,5-dihydro-1*H*-imidazole-1-oxyl**

**Patrick Taylor and Paul M. Lahti\***

*Department of Chemistry, University of Massachusetts, Amherst MA 01003, USA.*

E-mail: [lahti@chem.umass.edu](mailto:lahti@chem.umass.edu)

|                                                               |              |
|---------------------------------------------------------------|--------------|
| Synthetic details for <b>1-2</b> .                            | Page S2      |
| Crystallographic details and ORTEP diagram for <b>1</b> .     | Pages S3-5   |
| Crystallographic details and ORTEP diagram for <b>2</b> .     | Pages S6-8   |
| FTIR spectra for <b>1-2</b> .                                 | Page S9      |
| Solution ESR spectra for <b>1-2</b> .                         | Page S10     |
| Equations used for magnetic analyses.                         | Page S11     |
| Computations of singlet-triplet gaps for dyads in <b>1, 3</b> | Pages S12-15 |

**(1) Synthetic Details for 1-2.**

2-(3',5'-Di-*tert*-butyl-4-hydroxyphenyl)-4,4,5,5-tetramethyl-4,5-dihydro-1,3-dihydroxy-1*H*-imidazole (4). 2,3-Bis(hydroxylamino)-2,3-dimethylbutane hydrogen sulfate monohydrate (0.246 g, 1 mmol) was suspended in 15 ml of absolute methanol in an oven-dried flask purged with argon. Triethyl amine (0.56 mL, 4 mmol) was added, followed by 3,5-di-*tert*-butyl-4-hydroxybenzaldehyde (0.500 g, 2.11 mmol). A West condenser was attached and the system heated gently under reflux for 4 days. The reaction was cooled and the resultant precipitate filtered to give **4** as a shiny white powder (0.155 g, 42%, mp 186-188 °C). Additional product could be obtained by chromatography of the evaporated filtrate (silica, dichloromethane). This material was used without further purification in the subsequent reaction step. <sup>1</sup>H-NMR (DMSO-*d*<sub>6</sub>):  $\delta$  7.67 (s, 2H), 7.19 (s, 2H), 6.79 (s, 1H), 4.35 (s, 1H), 1.37 (s, 18H), 1.05 (s, 12H)

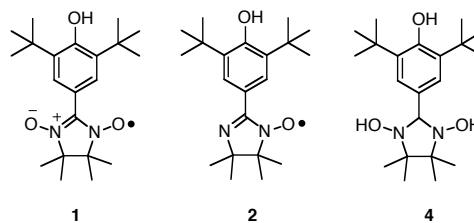

2-(3',5'-Di-*tert*-butyl-4-hydroxyphenyl)-4,4,5,5-tetramethyl-4,5-dihydro-1*H*-imidazole-3-oxide-1-oxyl (**1**). Diol **4** (0.031 g, 0.085 mmol) was dissolved in 5 mL of dichloromethane under argon. Sodium periodate (0.041 g, 0.192 mmol) was dissolved in 5 mL of distilled water and added to the reaction. The two-phase mixture was stirred vigorously for 25 min. The organic phase was collected, and the aqueous layer was back-extracted with dichloromethane. The combined organic layers were dried over anhydrous sodium carbonate and filtered. The solvent was removed from the filtrate under reduced pressure to give a dark blue solid that was purified by column chromatography (silica, 7:3 hexanes:ethylacetate) to yield **1** as deep blue solid (0.026 g, 84%, mp 184-185 °C [d]). FTIR (KBr, cm<sup>-1</sup>): 3443 (br), 2968, 2361, 1733. ESR (toluene, 298 K, 9.650 GHz): pentet,  $a_N = 7.56$  G. Analysis calc'd for C<sub>21</sub>H<sub>33</sub>N<sub>2</sub>O<sub>3</sub>; C 69.77, H 9.20, N 7.75: found C 69.83; H 9.16; N 20.49. MS(ESI, m/z): 252 (parent + H). Crystals suitable for X-ray analysis were obtained by slow evaporation under argon from a dichloromethane solution.

2-(3',5'-Di-*tert*-butyl-4-hydroxyphenyl)-4,4,5,5-tetramethyl-4,5-dihydro-1*H*-imidazole-1-oxyl (**2**). Radical **1** (9 mg, 0.025 mmol) was dissolved in 5 mL of dichloromethane under argon. Solid sodium nitrite (68 mg, 0.986 mmol) and 0.2 mL of a 0.1 M HCl solution were added to the dark blue solution, and the reaction allowed to stir until the reaction turned red (~30 min). The organic phase was collected, dried over anhydrous sodium carbonate, and evaporated under reduced pressure to give a brown/red solid. The crude product was purified by column chromatography (alumina, 7:3 hexanes:ethylacetate) to yield **2** as a red solid (3 mg, 35%, mp 190-192 °C). FTIR (KBr, cm<sup>-1</sup>): 3474 (br), 2969, 2367, 2341. ESR (toluene, 298 K, 9.652 GHz): seven lines,  $a_N = 9.33, 4.14$  G. Analysis calc'd for C<sub>21</sub>H<sub>33</sub>N<sub>2</sub>O<sub>2</sub>; C 73.00, H 9.63, N 8.11: found C 72.92; H 9.55; N 7.83. Crystals suitable for X-ray analysis were obtained from a 1:1 ethylacetate:hexane solution.

## (2) Crystallography for 1

For **1**; mp 184-185 °C. *Crystal data*: deep blue needle from dichloromethane, 0.35 × 0.35 × 0.20 mm, formula = C<sub>21</sub>H<sub>33</sub>N<sub>2</sub>O<sub>3</sub>, M = 361.49, monoclinic, space group *P*2<sub>1</sub>/*c*, T = 293 K, Z = 12, *a* = 17.3092(2), *b* = 30.9285(3), *c* = 12.1652(1) Å,  $\beta$  = 90.8163(5)°, *V* = 6511.95(11) Å<sup>3</sup>, *D*<sub>calc</sub> = 1.106 g cm<sup>-3</sup>,  $\lambda$ (Mo-K $\alpha$ ) = 0.7107 Å,  $\mu$  = 0.073 mm<sup>-1</sup>, *F*(000) = 2364. 21763 reflections were recorded at a threshold intensity of 2 $\sigma$ (*I*). 11406 independent reflections (*R*<sub>int</sub> = 0.0406) were analyzed with 705 parameters using SHELXL-97. For 6818 reflections with *I* > 2 $\sigma$ (*I*) *R*(*I* > 2 $\sigma$ ) = 0.0779, *wR*(*I* > 2 $\sigma$ ) = 0.2039; *R*(*all*) = 0.1279, *wR*(*all*) = 0.2281, goodness of fit on *F*<sup>2</sup> = 1.358. This structure has been submitted to the Cambridge Crystallographic Data Centre as CCDC Deposition #243200.

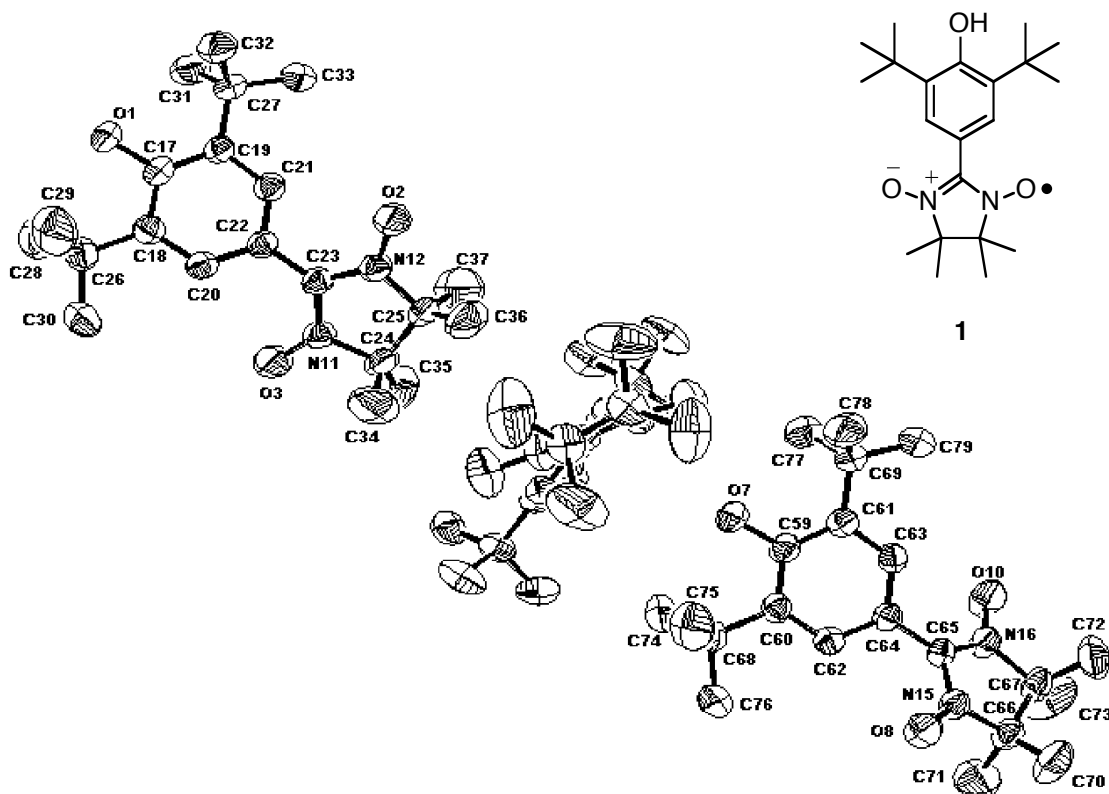

*Notes:* There are three different molecules in the unit cell, forming two slightly different H-bonding chains as shown in the main manuscript. The differences in the molecular geometries of the three molecules are very small.

**Selected Bonding Parameters for Compound 1 in angstroms (see numbering diagram on page S3).**

| <i>Nitronylnitroxide ONCNO units</i> |          | <i>Transannular Linkages</i>                           |          |
|--------------------------------------|----------|--------------------------------------------------------|----------|
| O(2)–N(12)                           | 1.291(2) | C(22)–C(23)                                            | 1.453(3) |
| O(3)–N(11)                           | 1.275(3) | C(43)–C(44)                                            | 1.453(3) |
| N(11)–C(23)                          | 1.350(3) | C(64)–C(65)                                            | 1.450(3) |
| N(12)–C(23)                          | 1.333(3) |                                                        |          |
|                                      |          | <i>Transannular Torsions</i>                           |          |
| O(5)–N(14)                           | 1.298(3) | N(11)–C(22)–C(21)C(19)                                 | –33.45°  |
| O(6)–N(13)                           | 1.275(3) | N(13)–C(44)–C(43)C(42)                                 | –33.85°  |
| N(13)–C(44)                          | 1.352(3) | N(15)–C(65)–C(64)C(62)                                 | –30.81°  |
| N(14)–C(44)                          | 1.327(3) |                                                        |          |
|                                      |          | <i>OH to ON contacts</i>                               |          |
| O(8)–N(15)                           | 1.291(2) | Phenol O(1) to nitroxide O(3)                          | 2.945    |
| O(10)–N(16)                          | 1.276(2) | Phenol O(4) to nitroxide O(9)                          | 2.901    |
| N(15)–C(65)                          | 1.346(3) | Phenol O(6) to nitroxide O(7)                          | 2.880    |
| N(16)–C(65)                          | 1.340(3) | Phenol H(?) to nitroxide O(3)                          | 2.880    |
|                                      |          | Phenol H(4) to nitroxide O(9)                          | 2.901    |
|                                      |          | Phenol H(6) to nitroxide O(7)                          | 2.880    |
|                                      |          | <i>Nitronylnitroxide CH<sub>3</sub> to ON contacts</i> |          |
| O(1)–C(17)                           | 1.361(3) | Methyl C(72) to nitroxide O(2)                         | 3.393    |
| C(17)–C(19)                          | 1.407(3) | Methyl C(79) to nitroxide O(2)                         | 3.309    |
| C(17)–C(18)                          | 1.419(3) | Methyl C(31) to nitroxide O(5)                         | 3.429    |
| C(18)–C(20)                          | 1.378(3) | Methyl C(58) to nitroxide O(5)                         | 3.271    |
| C(19)–C(21)                          | 1.381(3) |                                                        |          |
| C(20)–C(22)                          | 1.392(3) |                                                        |          |
| C(21)–C(22)                          | 1.391(3) |                                                        |          |
|                                      |          |                                                        |          |
| O(4)–C(38)                           | 1.357(3) |                                                        |          |
| C(38)–C(40)                          | 1.410(3) |                                                        |          |
| C(38)–C(39)                          | 1.417(3) |                                                        |          |
| C(39)–C(41)                          | 1.384(3) |                                                        |          |
| C(40)–C(42)                          | 1.380(3) |                                                        |          |
| C(41)–C(43)                          | 1.389(3) |                                                        |          |
| C(42)–C(43)                          | 1.403(3) |                                                        |          |
|                                      |          |                                                        |          |
| O(7)–C(59)                           | 1.359(3) |                                                        |          |
| C(59)–C(61)                          | 1.412(3) |                                                        |          |
| C(59)–C(60)                          | 1.415(3) |                                                        |          |
| C(60)–C(62)                          | 1.384(3) |                                                        |          |
| C(61)–C(63)                          | 1.384(3) |                                                        |          |
| C(62)–C(64)                          | 1.386(3) |                                                        |          |
| C(63)–C(64)                          | 1.399(3) |                                                        |          |

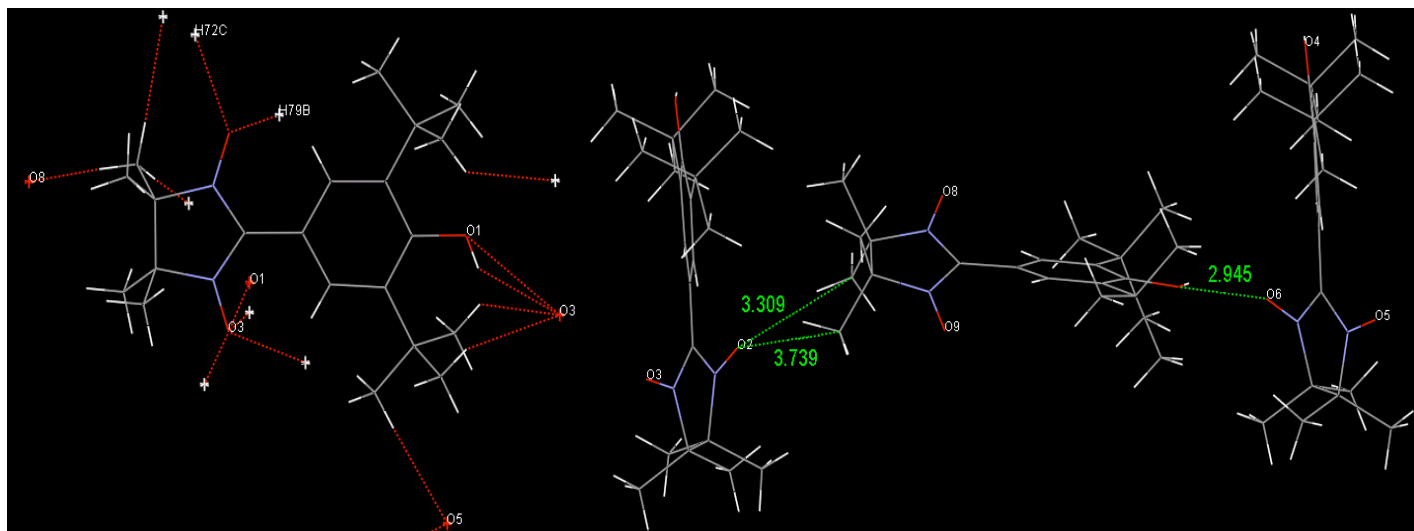

One phenolic OH to nitroxide ON chain is comprised of molecules containing the O(3)•••H-O(1) contacts shown above (green molecules below), the other chain is formed by the same motif, but with the other two molecules of the unit cell (blue and red molecules). The zig-zag chains are almost identical in geometry, as shown below, hence our treatment of the magnetic behavior by a single chain model. The distances shown below are based on the crystallographic assignments for the hydrogen atoms in the phenolic units. Both of these figures were made using the CCDC program Mercury version 1.2.

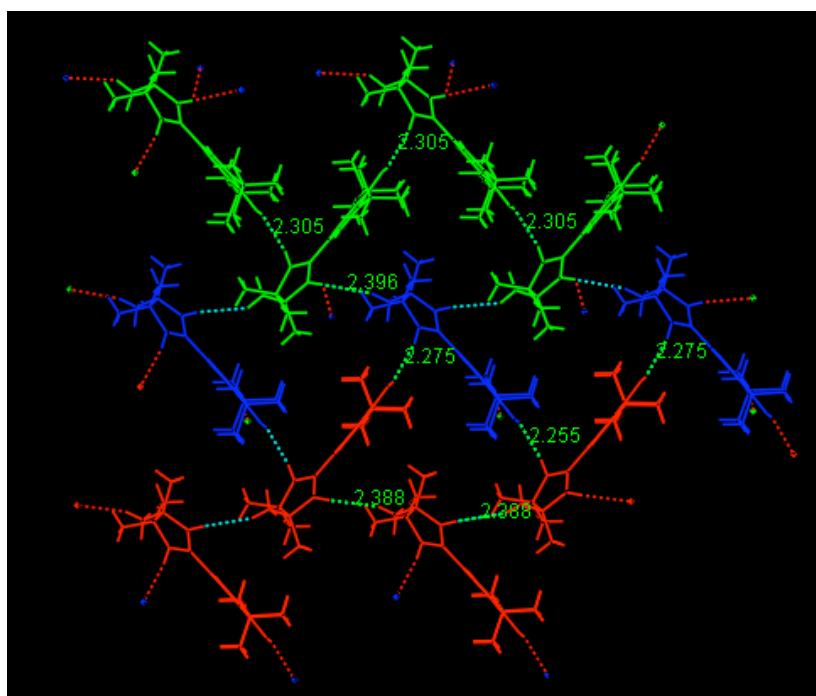

### (3) Crystallography for **2**

For **2**, mp 190-192 °C. *Crystal data*: red needle from hexanes/ethyl acetate, 0.70 × 0.50 × 0.15 mm, formula = C<sub>21</sub>H<sub>33</sub>N<sub>2</sub>O<sub>2</sub>, M = 345.49, orthorhombic, space group *P*2<sub>1</sub>2<sub>1</sub>2<sub>1</sub>, T = 173 K, Z = 12, *a* = 111.8548(1), *b* = 17.1035(2), *c* = 30.8698(4) Å, *V* = 625912(12) Å<sup>3</sup>, *D*<sub>calc</sub> = 1.100 g cm<sup>-3</sup>, ρ(Mo-Kα) = 0.7107 Å, ρ = 0.070 mm<sup>-1</sup>, *F*(000) = 2268. 10723 reflections were recorded at a threshold intensity of 2σ(*I*). 10723 independent reflections (*R*<sub>int</sub> = 0.000) were analyzed with 705 parameters using SHELXL-97. For 7222 reflections with *I* > 2σ(*I*) *R*(*I* > 2σ) = 0.0680, *wR*(*I* > 2σ) = 0.1579; *R*(*all*) = 0.1122, *wR*(*all*) = 0.1834, goodness of fit on *F*<sup>2</sup> = 1.032. An absolute structure parameter of 0(3) was used. This structure has been submitted to the Cambridge Crystallographic Data Centre as CCDC Deposition #243201.

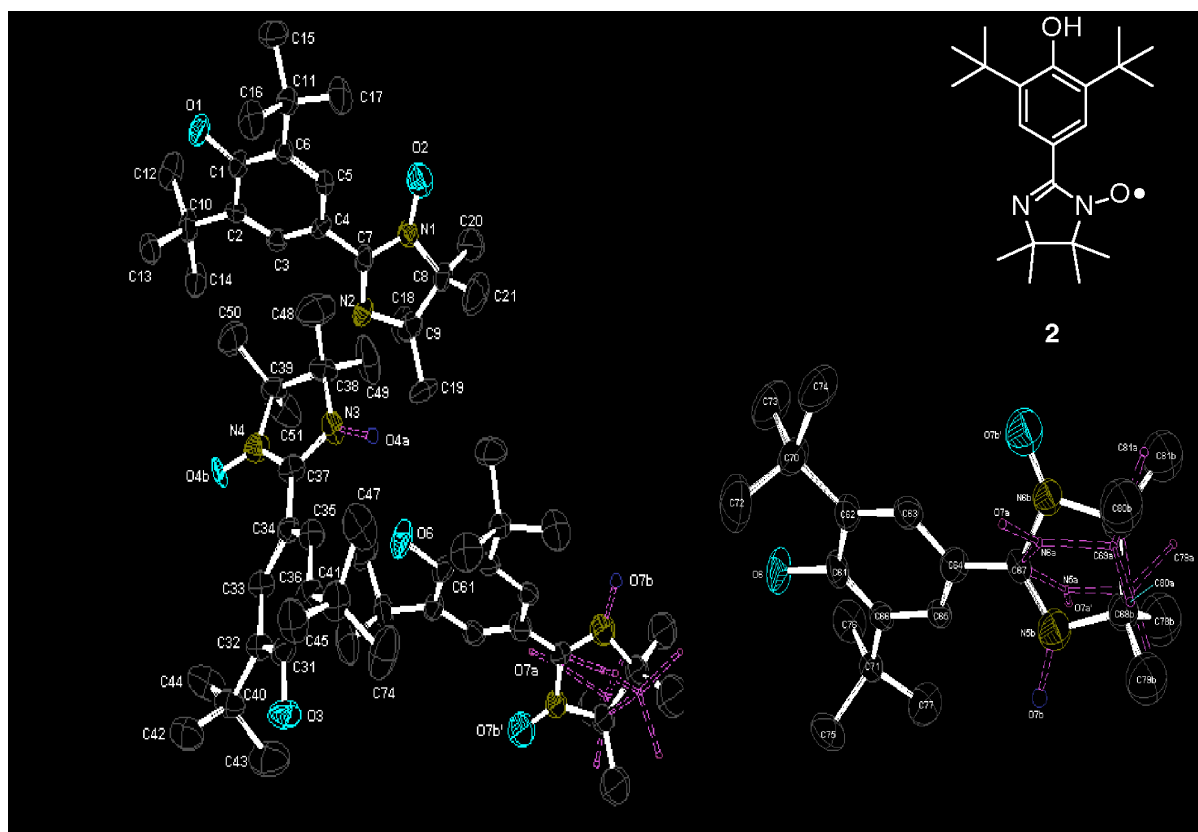

*Notes*: No hydrogen atoms are shown, for ease of viewing. See the CIF file deposited with the CCDC, and submitted as supporting material with this manuscript, for further details. (a) the proton attached to O1 was not located. (b) All positions shown in green are alternate positions due to disorder, even at -100 °C [disorder was worse at room temperature]. (c) the N-O positions are substantially disordered: the occupancies are

- C68a = 50%, C68b = 50%;
- N5a = 50 %, N6a = 50%;
- O4a = 65%/ O4b = 35%;
- O7a = 40%, O7a' = 10% (not labeled above), O7b = 30%, O7b' = 20%.

There are three different molecules in the cell – the most disordered is shown to the right.

## Selected Bonding Parameters for Compound 2 in angstroms (see numbering diagram on page S6).

| <i>Iminoylnitroxide ONCN units</i> |           | <i>Transannular Linkages</i>                          |          |
|------------------------------------|-----------|-------------------------------------------------------|----------|
| O(1)-C(1)                          | 1.363(5)  | C(4)-C(7)                                             | 1.489(5) |
| O(2)-N(1)                          | 1.275(4)  | C(34)-C(37)                                           | 1.482(5) |
| N(1)-C(7)                          | 1.360(5)  | C(64)-C(67)                                           | 1.447(6) |
| N(1)-C(8)                          | 1.474(5)  |                                                       |          |
| N(2)-C(7)                          | 1.308(5)  | <i>Transannular Torsions</i>                          |          |
| N(2)-C(9)                          | 1.478(5)  | N(4)-C(37)-C(34)C(33)                                 | -32.40°  |
|                                    |           | N(1)-C(7)-C(4)C(5)                                    | -29.03°  |
| O(4A)-N(3)                         | 1.201(4)  | N(6A)-C(67)-C(64)C(63)                                | -24.87°  |
| O(4B)-N(4)*                        | 1.160(6)  | N(5B)-C(67)-C(64)C(65)***                             | -30.81°  |
| N(3)-C(37)                         | 1.366(5)  |                                                       |          |
| N(3)-C(38)                         | 1.480(5)  | <i>OH to ON contacts</i>                              |          |
| N(4)-C(37)                         | 1.309(5)  | Phenol O(1) to nitroxide O(2)                         | 2.936    |
| N(4)-C(39)                         | 1.487(5)  | Phenol O(3) to nitroxide O(7A)                        | 2.981    |
|                                    |           | Phenol O(6) to nitroxide O(4A)                        | 2.949    |
| O(7A)-N(6A)                        | 1.226(8)  | Phenol H(1C) to nitroxide O(4A)                       | 2.191    |
| O(7B')-N(6B)*                      | 1.162(15) | Phenol H(1B) to nitroxide O(7A)                       | 2.186    |
| O(7A')-N(5A)**                     | 1.06(3)   | (the hydrogen on O(1) was not located)                |          |
| O(7B)-N(5B)***                     | 1.206(12) |                                                       |          |
| N(5A)-C(67)                        | 1.365(7)  | <i>Iminoylnitroxide CH<sub>3</sub> to ON contacts</i> |          |
| N(5A)-C(68A)                       | 1.539(10) | Methyl C(18) to nitroxide O(4B)                       | 3.285    |
| N(6A)-C(67)                        | 1.310(7)  | Methyl C(20) to nitroxide O(4B)                       | 3.774    |
| N(6A)-C(69A)                       | 1.500(11) | Methyl C(80A) to nitroxide O(7A)                      | 2.930    |
| N(5B)-C(67)                        | 1.278(8)  | Methyl C(80B) to nitroxide O(7A)                      | 3.153    |
| N(5B)-C(68B)                       | 1.508(10) | Methyl C(45) to nitroxide O(7B)                       | 3.383    |
| N(6B)-C(67)                        | 1.390(7)  | Methyl C(46) to nitroxide O(7B)                       | 2.933    |
| N(6B)-C(69B)                       | 1.516(11) |                                                       |          |
| <i>Phenolic Rings</i>              |           |                                                       |          |
| O(1)-C(1)                          | 1.363(5)  |                                                       |          |
| C(1)-C(6)                          | 1.406(5)  |                                                       |          |
| C(1)-C(2)                          | 1.445(5)  |                                                       |          |
| C(2)-C(3)                          | 1.366(5)  |                                                       |          |
| C(3)-C(4)                          | 1.389(5)  |                                                       |          |
| C(4)-C(5)                          | 1.402(5)  |                                                       |          |
| C(5)-C(6)                          | 1.381(5)  |                                                       |          |
| O(3)-C(31)                         | 1.378(5)  |                                                       |          |
| C(31)-C(32)                        | 1.381(6)  |                                                       |          |
| C(31)-C(36)                        | 1.415(6)  |                                                       |          |
| C(32)-C(33)                        | 1.403(5)  |                                                       |          |
| C(33)-C(34)                        | 1.391(5)  |                                                       |          |
| C(34)-C(35)                        | 1.396(5)  |                                                       |          |
| C(35)-C(36)                        | 1.385(6)  |                                                       |          |
| O(6)-C(61)                         | 1.391(5)  |                                                       |          |
| C(61)-C(66)                        | 1.370(6)  |                                                       |          |
| C(61)-C(62)                        | 1.416(6)  |                                                       |          |
| C(62)-C(63)                        | 1.393(5)  |                                                       |          |
| C(63)-C(64)                        | 1.384(6)  |                                                       |          |
| C(64)-C(65)                        | 1.382(5)  |                                                       |          |
| C(65)-C(66)                        | 1.404(5)  |                                                       |          |

\* Disordered position relative to N(6A).

\*\*Alternate position (torsional disordered site)

\*\*\*Alternate position (torsional disordered site).

### Contacts for molecules in the unit cell of **2**.

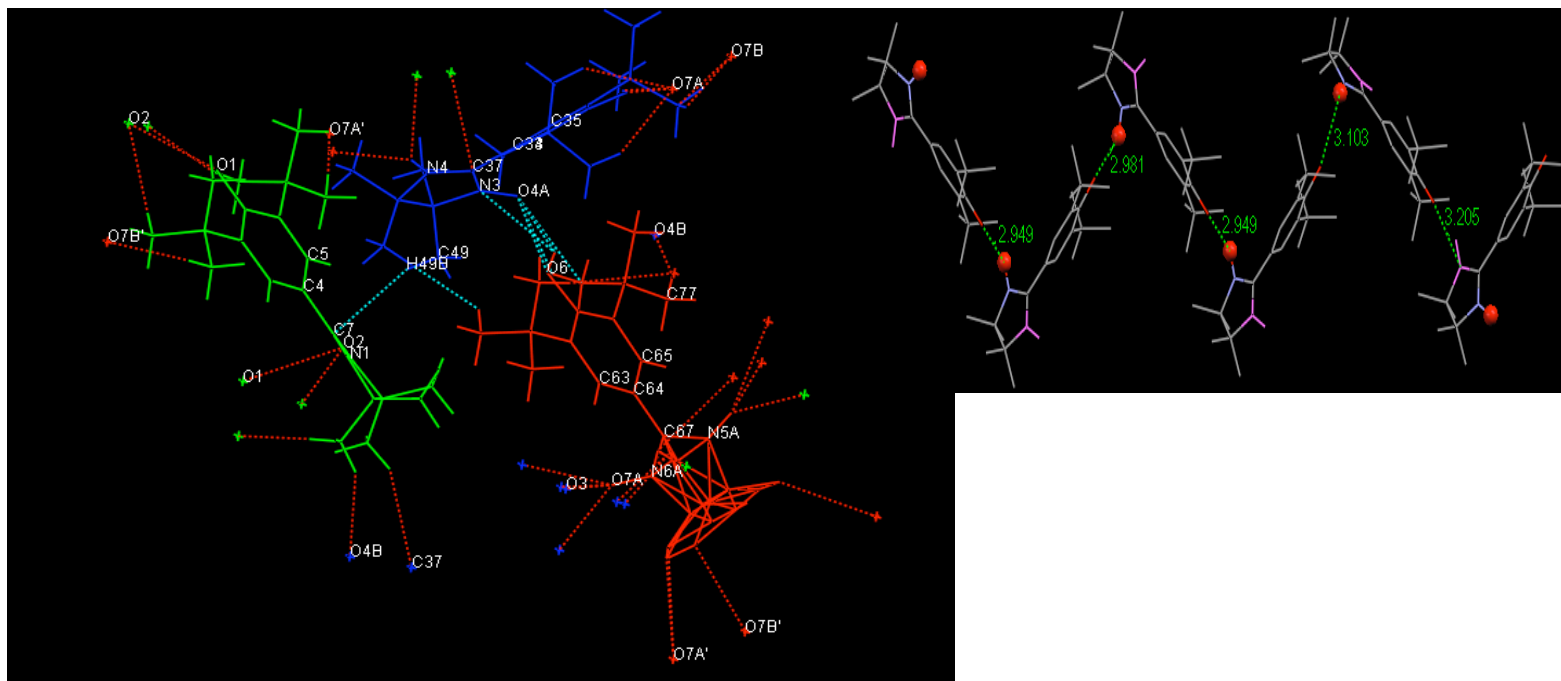

The expansion above shows the three distinct molecules in the unit cell, and various close contacts from the nitroxide NO groups to nitroxide methyl CH and phenolic OH groups. One OH proton was not located crystallographically, so only the oxygen is shown, O(1). The figure below shows the close contact CH to ON and OH to NO for the “chains” in this system, showing both of the disordered NO group positions in cases where there is nitroxide disorder in the iminoylnitroxide group. Thus, *the reader should keep in mind that the actual “chains” are incomplete (frustrated)*, due to a lack of sufficient N-O bonds to form extended chains. If each chain were essentially complete, with disorder in the directionality of one chain versus another, we would have expected that the magnetic behavior of **2** would fit a relatively simple AFM 1-D chain behavior (it does not). These figures were made using the CCDC program Mercury version 1.2.

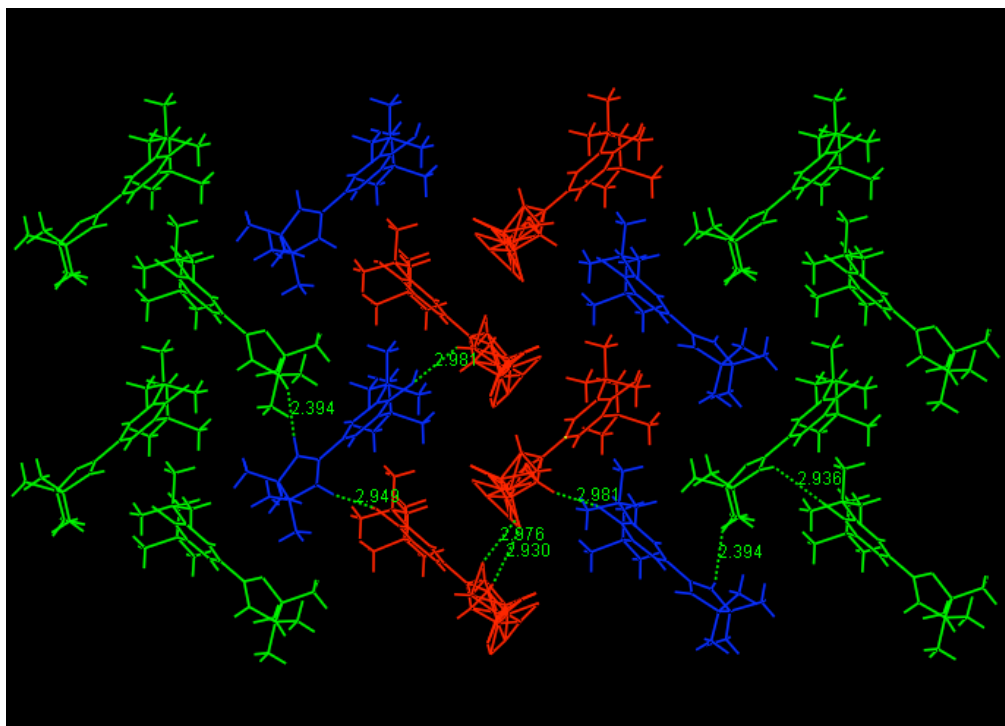

**(4) FTIR spectra for 1-2**SPECTRUM Of **1**, KBr pellet, below.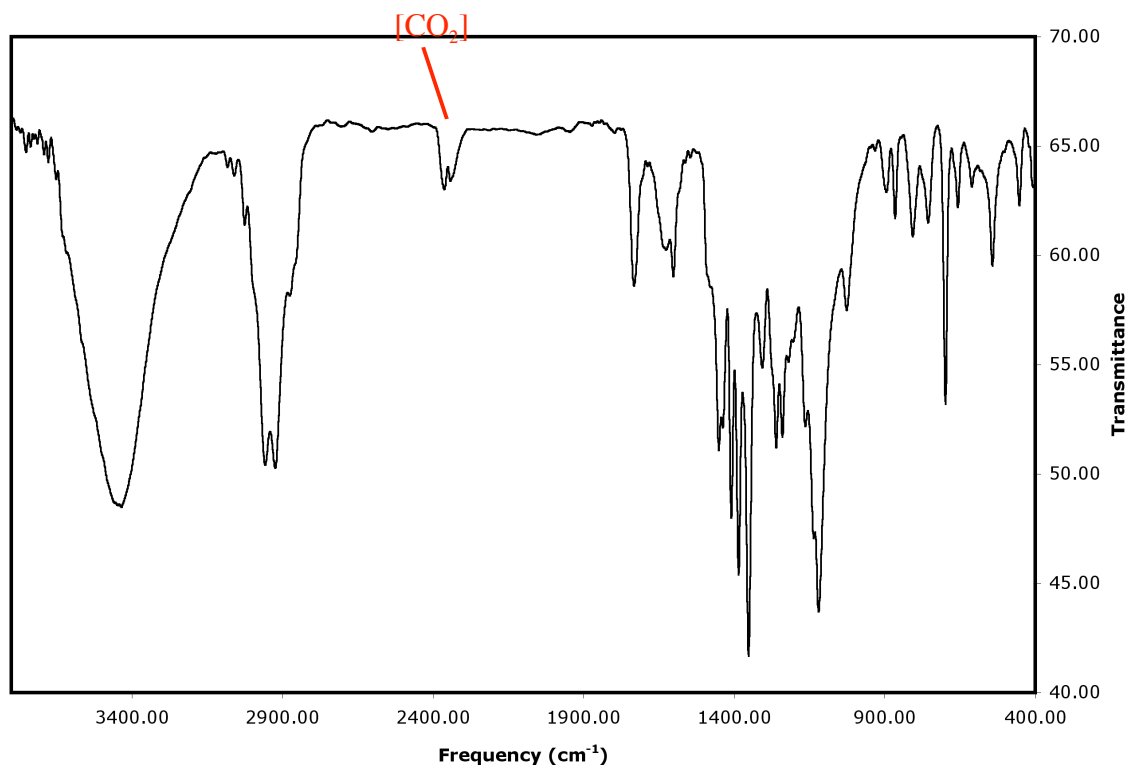SPECTRUM Of **2**, KBr pellet, below.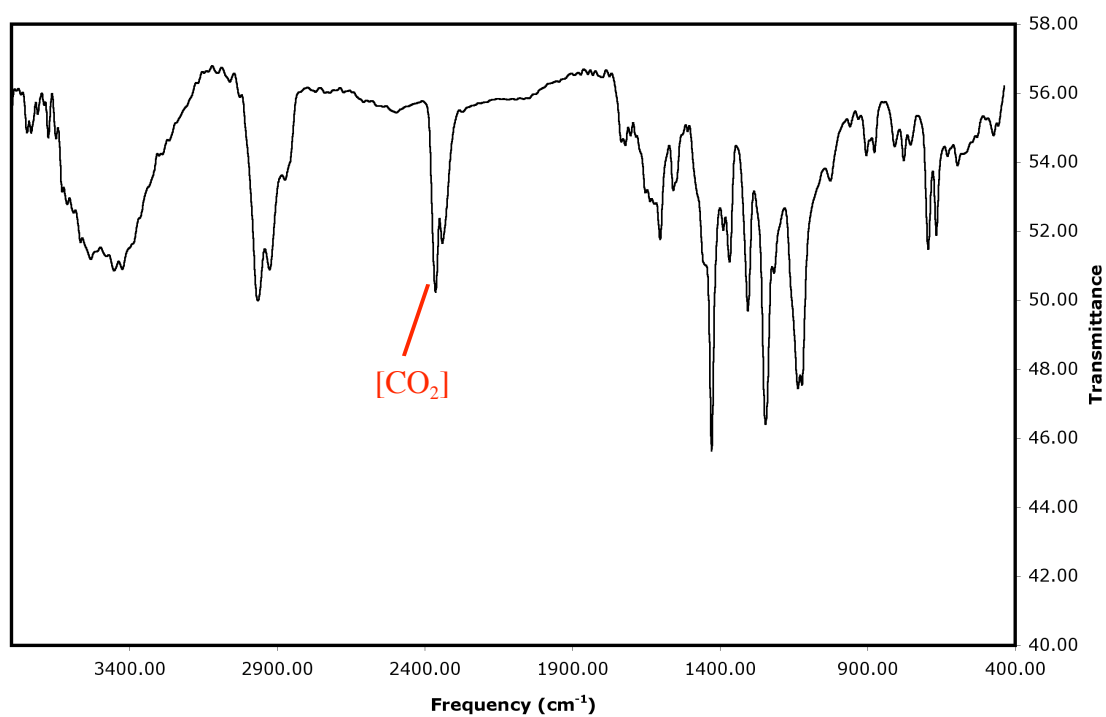

**(4) ESR spectra, room temperature.**

SPECTRUM Of **1**, 9.650 GHz, toluene, below, black trace. Red trace from WINSIM simulator (D. R. Duling, *J. Magn. Res.*, 1994, **B104**, 105-110),  $a(N) = 7.55$  G (2), correlation coefficient = 0.99.

File: npphenolsim.lmb

Experiment

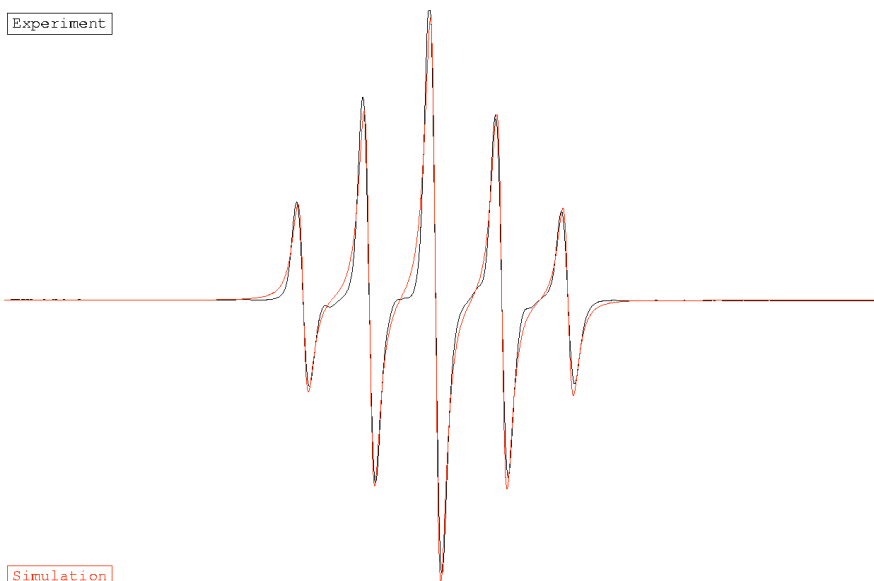

Simulation

\*\* NIEHS \*\* Public EPR Software Tools \*\* WinSIM \*\*

SPECTRUM Of **2**, 9.652 GHz, toluene, below, black trace. Red trace from WINSIM simulator (D. R. Duling, *J. Magn. Res.*, 1994, **B104**, 105-110),  $a(N) = 9.33, 4.14$  G, correlation coefficient = 0.98.

File: inphenol.lmb

Experiment

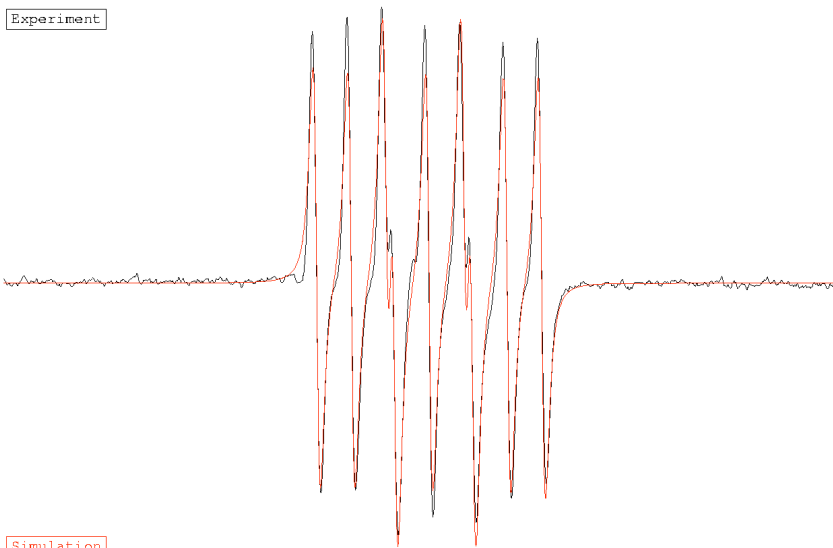

Simulation

\*\* NIEHS \*\* Public EPR Software Tools \*\* WinSIM \*\*

#### (4) Magnetic Analyses.

(1) Bonner-Fisher 1-D Heisenberg Chain Model (J. C. Bonner and M. E. Fisher, *Phys. Rev. A*, 1964, **135**, 650. J. C. Bonner, Ph. D. Dissertation, University of London, UK, 1968.

T = absolute temperature, J = exchange constant, S = spin quantum number,  $\mu_B$  = Bohr magneton, g = Landé constant,  $\chi$  = mean field constant, P = fraction of isolated paramagnetic spins in sample.

$$\chi = (1 - P) \frac{4 \cdot C_0}{T} \frac{A + Bx + Cx^2}{1 + Dx + Ex^2 + Fx^3} + P \frac{0.375}{T}$$

$$x = |J/kT|; C_0 = Ng^2 \mu_B^2 S(S+1)/3k$$

P=paramagnetic component

The fitted parameters were P, J,  $\chi$ .

(2) Double Bleaney-Bowers fit (B. Bleaney and K. D. Bowers, *Proc. R. Soc. London, A*, 1952, 214.)

$$\chi = (1 - P) \frac{2 \cdot C_0}{T} \frac{2e^x}{1 + 3e^x} + P \frac{2 \cdot C_0}{T} \frac{2e^y}{1 + 3e^y}$$

$$x = |J_1/kT|; y = |J_2/kT|; C_0 = 0.375g^2/4$$

Here, P = fraction of **2** with exchange coupling  $J_1$ , (1-P) = fraction with  $J_2$ .  
The fitted parameters were P,  $J_1$ ,  $J_2$ , g.

#### (4) Computational Modeling for Exchange Involving H-bonding contact

##### (Model for H-bond in molecule 1)

Test job not archived.

```
1\1\GINC-GROND\SP\UB3LYP\6-31G(d)\C8H10N4O5(3)\LAHTI\31-Mar-2004\0\#P
GFINPUT IOP(6/7=3) UB3LYP DIRECT 6-31G(D) TEST GUESS=(READ)\Triplet
state of 4-hydroxy-3,5-di-t-butylphenol nitronylnitroxide H-Bond conta
ct interaction\0,3\C,0,4.269,11.14,1.125\O,0,2.308,3.242,7.873\O,0,6.
165,4.876,5.955\N,0,5.167,4.109,6.246\N,0,3.332,3.355,7.122\C,0,5.514,
9.592,2.57\C,0,4.293,10.052,2.086\N,0,3.332,12.109,1.04\O,0,6.165,10.5
89,-0.127\O,0,4.388,6.855,4.691\C,0,4.269,4.324,7.207\H,0,2.302,9.804,
2.275\H,0,5.156,6.643,4.885\C,0,3.138,8.412,3.446\O,0,2.308,12.222,1.7
91\C,0,4.407,7.944,3.876\N,0,5.167,11.355,0.163\C,0,5.61,8.558,3.481\H
,0,2.206446882,7.938014333,3.775791206\H,0,6.296,9.996,2.268\H,0,3.480
098532,12.731825321,0.256227451\H,0,5.032612538,12.231557432,-0.324576
631\H,0,4.287109433,5.144960939,7.932886452\H,0,3.480175198,2.73185221
8,6.338498248\H,0,6.590990572,8.231712471,3.844881517\H,0,5.032534828,
3.232611382,5.758141409\C,0,3.121,9.47,2.562\Version=SGI64-G03RevB.03
\State=3-A\HF=-905.5785289\S2=2.12696\S2-1=0.\S2A=2.006863\RMSD=2.572e
-05\Dipole=0.3657787,-0.6800955,-0.1669224\PG=C01 [X(C8H10N4O5)]\e
```

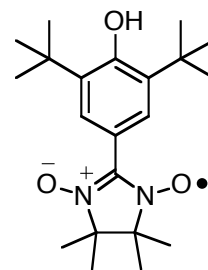

Mulliken atomic spin densities:

|      | 1         |
|------|-----------|
| 1 C  | -0.222481 |
| 2 O  | 0.431661  |
| 3 O  | 0.341915  |
| 4 N  | 0.256242  |
| 5 N  | 0.245144  |
| 6 C  | -0.032557 |
| 7 C  | 0.038788  |
| 8 N  | 0.258686  |
| 9 O  | 0.375821  |
| 10 O | -0.005106 |
| 11 C | -0.264612 |
| 12 H | 0.001399  |
| 13 H | 0.002838  |
| 14 C | 0.014813  |
| 15 O | 0.396878  |
| 16 C | -0.028503 |
| 17 N | 0.244426  |
| 18 C | 0.014459  |
| 19 H | -0.000552 |
| 20 H | 0.001409  |
| 21 H | -0.013723 |
| 22 H | -0.012988 |
| 23 H | 0.012451  |
| 24 H | -0.012912 |
| 25 H | -0.000674 |
| 26 H | -0.013013 |
| 27 C | -0.029807 |

Sum of Mulliken spin densities= 2.00000

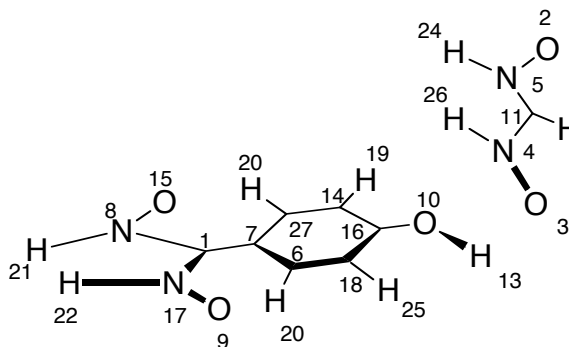

Heavy atom positions taken from crystal structure of 1 in this work.

Test job not archived.

```
1\1\GINC-GROND\SP\UB3LYP\6-31G(d)\C8H10N4O5\LAHTI\30-Mar-2004\0\#\ UB3
LYP DIRECT 6-31G(D) TEST GUESS=(READ,MIX)\Singlet state of 4-hydroxy-
3,5-di-t-butylphenol nitronylnitroxide\0,1\C,0,4.269,11.14,1.125\O,0,
2.308,3.242,7.873\O,0,6.165,4.876,5.955\N,0,5.167,4.109,6.246\N,0,3.33
2,3.355,7.122\C,0,5.514,9.592,2.57\C,0,4.293,10.052,2.086\N,0,3.332,12
.109,1.04\O,0,6.165,10.589,-0.127\O,0,4.388,6.855,4.691\C,0,4.269,4.32
4,7.207\H,0,2.302,9.804,2.275\H,0,5.156,6.643,4.885\C,0,3.138,8.412,3.
446\O,0,2.308,12.222,1.791\C,0,4.407,7.944,3.876\N,0,5.167,11.355,0.16
3\C,0,5.61,8.558,3.481\H,0,2.206446882,7.938014333,3.775791206\H,0,6.2
96,9.996,2.268\H,0,3.480098532,12.731825321,0.256227451\H,0,5.03261253
8,12.231557432,-0.324576631\H,0,4.287109433,5.144960939,7.932886452\H,
0,3.480175198,2.731852218,6.338498248\H,0,6.590990572,8.231712471,3.84
4881517\H,0,5.032534828,3.232611382,5.758141409\C,0,3.121,9.47,2.562\
Version=SGI64-G03RevB.03\State=1-A\HF=-905.5785338\S2=1.127808\S2-1=0.
\S2A=1.001808\RMSD=1.376e-05\Dipole=0.4070793,-0.6831437,-0.1788483\PG
=C01 [X(C8H10N4O5)]\e
```

Mulliken atomic spin densities:

|    |   |           |
|----|---|-----------|
|    | 1 |           |
| 1  | C | 0.223535  |
| 2  | O | 0.430706  |
| 3  | O | 0.343753  |
| 4  | N | 0.255787  |
| 5  | N | 0.246345  |
| 6  | C | 0.032447  |
| 7  | C | -0.039005 |
| 8  | N | -0.259203 |
| 9  | O | -0.376868 |
| 10 | O | 0.006148  |
| 11 | C | -0.266513 |
| 12 | H | -0.001379 |
| 13 | H | 0.002558  |
| 14 | C | -0.014434 |
| 15 | O | -0.396230 |
| 16 | C | 0.028042  |
| 17 | N | -0.244432 |
| 18 | C | -0.014149 |
| 19 | H | 0.000517  |
| 20 | H | -0.001413 |
| 21 | H | 0.013725  |
| 22 | H | 0.013008  |
| 23 | H | 0.012711  |
| 24 | H | -0.012963 |
| 25 | H | 0.000587  |
| 26 | H | -0.013010 |
| 27 | C | 0.029730  |

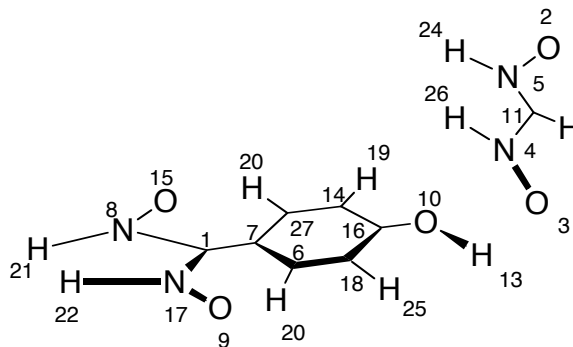

Heavy atom positions taken from crystal structure of **1** in this work.

**(Model for H-bond in molecule 3)**

Test job not archived.

```

1\1\GINC-GROND\SP\UB3LYP\6-31G(d)\C8H10N4O5(3)\LAHTI\31-Mar-2004\0\#P
GFINPUT IOP(6/7=3) UB3LYP DIRECT 6-31G(D) TEST GUESS=(READ)\Veciana
4OHPH-NN h-bond contact, triplet state\0,3\H,0,6.612,5.256,16.615\O,0
,10.274,8.29,15.691\O,0,12.864,12.076,16.172\N,0,10.654,9.513,15.839\N
,0,11.865,11.296,16.031\H,0,8.294,2.113,14.75\N,0,5.983,1.43,16.031\O
,0,10.698,5.731,14.98\C,0,8.476,5.616,15.913\H,0,8.518,6.541,16.263\C,0
,11.912,9.947,15.855\H,0,10.934340466,11.674562036,15.909726141\C,0,7.
332,4.874,16.145\C,0,9.544,5.05,15.257\C,0,8.339,3.012,15.051\C,0,9.47
9,3.726,14.836\H,0,10.271,3.398,14.433\O,0,4.392,4.436,15.691\H,0,9.96
610969,10.229215157,16.033902252\O,0,6.981,0.65,16.172\H,0,12.83067355
,9.362872316,15.728312558\C,0,7.24,3.549,15.688\H,0,5.052237099,1.0516
68307,15.909799939\H,0,10.612442341,6.638091523,15.27602132\H,0,4.0841
0969,2.496784843,16.033902252\C,0,6.03,2.779,15.855\N,0,4.772,3.213,15
.839\Version=SGI64-G03RevB.03\State=3-A\HF=-905.5941257\S2=2.129074\S
2-l=0.\S2A=2.007094\RMSD=7.126e-06\Dipole=0.1926881,1.7879341,0.1715823
\PG=C01 [X(C8H10N4O5)]\@

```

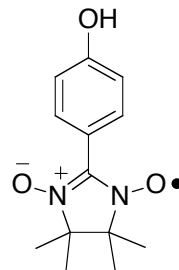

Mulliken atomic spin densities:

| 1  |   |           |
|----|---|-----------|
| 1  | H | 0.001623  |
| 2  | O | 0.321609  |
| 3  | O | 0.457095  |
| 4  | N | 0.254599  |
| 5  | N | 0.247466  |
| 6  | H | 0.001468  |
| 7  | N | 0.271016  |
| 8  | O | -0.006878 |
| 9  | C | 0.014396  |
| 10 | H | -0.000829 |
| 11 | C | -0.265583 |
| 12 | H | -0.012944 |
| 13 | C | -0.035385 |
| 14 | C | -0.028043 |
| 15 | C | -0.031255 |
| 16 | C | 0.015532  |
| 17 | H | -0.000611 |
| 18 | O | 0.363023  |
| 19 | H | -0.012217 |
| 20 | O | 0.408366  |
| 21 | H | 0.012659  |
| 22 | C | 0.040306  |
| 23 | H | -0.013962 |
| 24 | H | -0.002442 |
| 25 | H | -0.012259 |
| 26 | C | -0.222454 |
| 27 | N | 0.235702  |

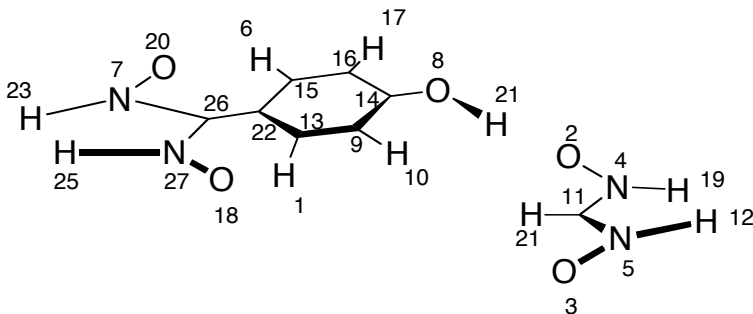

Sum of Mulliken spin densities= 2.00000

Heavy atom positions taken from CCDC ref # 624500 (HAFXOB); E. Hernandez, M. Mas, E. Molins, C. Rovira, J. Veciana, *Angew. Chem. Int. Ed. Engl.*, **32**, 882 (1993).

Test job not archived.

```
1\1\GINC-GROND\SP\UB3LYP\6-31G(d)\C8H10N4O5\LAHTI\31-Mar-2004\0\#\#P GF
INPUT IOP(6/7=3) UB3LYP DIRECT 6-31G(D) TEST GUESS=(READ,MIX)\Veciana
4OHPh-NN h-bond contact, singlet state\0,1\H,0,6.612,5.256,16.615\O,
0,10.274,8.29,15.691\O,0,12.864,12.076,16.172\N,0,10.654,9.513,15.839\
N,0,11.865,11.296,16.031\H,0,8.294,2.113,14.75\N,0,5.983,1.43,16.031\O
,0,10.698,5.731,14.98\C,0,8.476,5.616,15.913\H,0,8.518,6.541,16.263\C,
0,11.912,9.947,15.855\H,0,10.934340466,11.674562036,15.909726141\C,0,7
.332,4.874,16.145\C,0,9.544,5.05,15.257\C,0,8.339,3.012,15.051\C,0,9.4
79,3.726,14.836\H,0,10.271,3.398,14.433\O,0,4.392,4.436,15.691\H,0,9.9
6610969,10.229215157,16.033902252\O,0,6.981,0.65,16.172\H,0,12.8306735
5,9.362872316,15.728312558\C,0,7.24,3.549,15.688\H,0,5.052237099,1.051
668307,15.909799939\H,0,10.612442341,6.638091523,15.27602132\H,0,4.084
10969,2.496784843,16.033902252\C,0,6.03,2.779,15.855\N,0,4.772,3.213,1
5.839\Version=SGI64-G03RevB.03\State=1-A\HF=-905.5941145\S2=1.128123\
S2-1=0.\S2A=1.004133\RMSD=2.592e-05\Dipole=-0.1902365,1.7878256,0.1739
83\PG=C01 [X(C8H10N4O5)]\@
```

Mulliken atomic spin densities:

|    |   |           |
|----|---|-----------|
| 1  | H | -0.001510 |
| 2  | O | 0.321108  |
| 3  | O | 0.457399  |
| 4  | N | 0.254781  |
| 5  | N | 0.247746  |
| 6  | H | -0.001355 |
| 7  | N | -0.271686 |
| 8  | O | 0.006466  |
| 9  | C | -0.012493 |
| 10 | H | 0.000124  |
| 11 | C | -0.265965 |
| 12 | H | -0.012986 |
| 13 | C | 0.033522  |
| 14 | C | 0.026808  |
| 15 | C | 0.029499  |
| 16 | C | -0.013804 |
| 17 | H | 0.000498  |
| 18 | O | -0.360491 |
| 19 | H | -0.012188 |
| 20 | O | -0.409735 |
| 21 | H | 0.012824  |
| 22 | C | -0.038353 |
| 23 | H | 0.014099  |
| 24 | H | -0.002865 |
| 25 | H | 0.012020  |
| 26 | C | 0.220949  |
| 27 | N | -0.234411 |

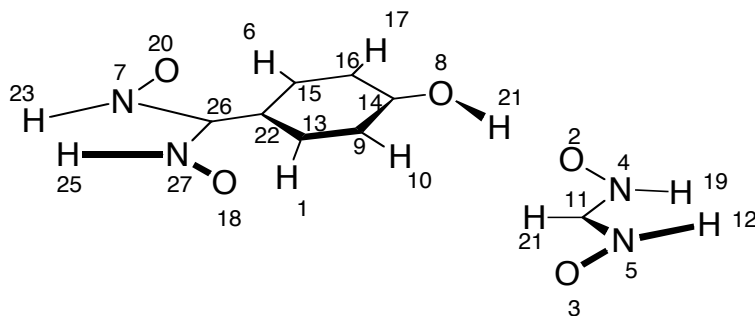

Heavy atom positions taken from CCDC ref # 624500 (HAFXOB); E. Hernandez, M. Mas, E. Molins, C. Rovira, J. Veciana, *Angew. Chem. Int. Ed. Engl.*, **32**, 882 (1993).
